# Supplementary material
Source: publisher figshare collection journal article supplement (https://springernature.figshare.com/ndownloader/files/20151770)
Supplement: Supplementary file [file 20151770]

Additional file 1.

Supplementary information to

“General practitioners’ accounts of negotiating antibiotic prescribing decisions with patients: A qualitative study on what influences antibiotic prescribing in low, medium and high prescribing practices”

## **Additional file 1.1**

### **Topic guide**

#### **1. Pre-amble to the interview**

#### **2. Introductory questions**

*2.1 Could you briefly introduce yourself (do not say your full name)? Some general information on what is your professional role and what is your experience as a GP would be sufficient.*

***Probes.** What's your role within the practice (GP partner, salary GP, GP trainee)? How many years of experience do you have? Do you have experience in training other GPs?*

*2.2 The interviewer introduces the following section of the interview and explains that questions will be limited for parsimony to the three most prescribed diseases: upper respiratory tract infection (URTI), lower respiratory tract infection (LRTI), and urinary tract infection (UTI).*

#### **3. Risk of infection-related complications (such as hospital admission for pneumonia or sepsis)**

*3.1 How important is a patient's risk of complications such as hospital admission in your decision to prescribe an antibiotic?*

*3.2 Recent research has found that there is a substantive variability in the risk of infection-related complications but that the decision to prescribe antibiotics was not related to this. Patients with very low risks (such as younger otherwise healthy adults) often got antibiotics while patients with high risks (such as elderly patients with co-morbidity) were sometimes left untreated. What do you think could be the reasons that explain this?*

#### **4. Factors that influence prescribing when facing diagnostic uncertainty**

*4.1 Could you briefly describe a recent relevant case of URTI, LRTI or UTI in which you were uncertain on whether or not it was appropriate to prescribe an antibiotic?*

***Probes.** How was the patient? Can you describe what motivated your decision in that particular occasion? Was it how the patient described their symptoms or was how worried the patient was? What was the outcome? Was an antibiotic prescribed?*

*4.2 Did you feel you had enough time to do the consultation?*

***Probes.** Did you feel rushed? How long did the consultation last?*

*4.3 What guidelines on antibiotic prescribing (AP) most influence your work? (e.g., national guidelines on AP, local clinical commissioning group CCG policy, or others).*

***Probes.** Can you tell me more about the reasons why you consider one more influential than the others?*

4.4 Do you ever consult other GPs' for opinions and past experiences of AP decision making?

4.5 What could help you in optimising antibiotic prescribing for common infections?

**Probes.** Point-of-care testing? Simple home monitoring of patients? Prediction of risk of hospital admission based on a patient's characteristics?

## **5. Experiences of demand to AP from patients and carers**

5.1 Would you say that URTI, LRTI or UTI patients expect to be prescribed an antibiotic?

**Probes.** Frequent or rarely? Can you describe a recent occasion in which this has happened? How the patient/carer expressed their wishes? What reasons did they give? How do you think that affected your decision?

## **6. Perceptions of the relation between AP and patients' satisfaction;**

6.1 What would you say are patients' main expectations around a consultation for URTI, LRTI or UTI?

6.2 Would you consider that the decision to prescribe an antibiotic has an impact on patients' satisfaction around the consultation?

## **7. Variability of antibiotic prescribing in general practices**

7.1 Recent research has found that there is substantive variability in the level of antibiotic prescribing for common infections such as URTI, LRTI or UTI. In some practices, only 20% of patients get an antibiotic while in others more than 80% do. What do you think could be the reasons that explain this?

7.2 Recent research in UK general practices has found that the practices that prescribe lots of antibiotics see their patients more frequently (higher consultation rates) and have shorter durations of consultations. Do you think that practice characteristics are important drivers for antibiotic prescribing and what are these?

7.3 The same research also found that the practices that prescribe lots of antibiotics are prescribed more others drugs, including pain killer and benzodiazepines. What do you think is happening?

7.4. Recent research has found that there is a substantive regional variability in antibiotic prescribing. Practices in Greater Manchester prescribe more antibiotics than practices in London. What explains this?

## **8. Awareness on Anti-Microbial Resistance (AMR)**

8.1 Are you aware of any particular AMR in the local area?

**Probes.** Have you experienced any forms of resistance to antibiotics in your patient population?

*8.2 How does that knowledge affect your decision on whether you should prescribe an antibiotic? And which antibiotic should be prescribed?*

*8.3 How do you address AMR within your practice?*

*8.4. What do you think GPs can do to reduce AMR at the local level?*

## Additional file 1.2

### Codebook

| Name                                                      |
|-----------------------------------------------------------|
| acting on AMR                                             |
| auditing as means of monitoring AP                        |
| awareness of AMR among GPs                                |
| changes in local guidelines due to AMR                    |
| disease groups with resistance                            |
| factors impacting on creating AMR                         |
| GPs role in addressing AMR                                |
| choosing different types of AB                            |
| role of GPs in patient education around AMR               |
| impact of AMR awareness on prescribing                    |
| choosing type of AB based on resistance likelihood        |
| finding AP reduction reasonable                           |
| role of public health in raising patient awareness of AMR |
| communicating with patients                               |
| communicating with patients as a battle                   |
| doctor-patient relationship                               |
| giving AB if patient cannot be dissuaded                  |
| giving detailed explanations                              |
| link fulfilled patient expectations and satisfaction      |
| managing patient expectations with foresight              |
| prescribing to end the discussion                         |

| Name                                              |
|---------------------------------------------------|
| taking the time for communicating decision-making |
| using AB complications as bargaining tool         |
| decision-making processes                         |
| assessing patient's self-care abilities           |
| being aware of risk profile when prescribing      |
| case-by-case decision-making                      |
| combining evidence sources to reach decision      |
| dealing with clinical uncertainty                 |
| always making up a decision                       |
| consultations when decision is easy               |
| deferred prescribing                              |
| frequently being uncertain                        |
| prescribing happens defensively                   |
| safety netting to address uncertainty             |
| strategies when risks are uncertain               |
| uncertainty interpreting lab results              |
| deciding based on clinical experience             |
| diverging from guidelines                         |
| ending consultation quickly with AP               |
| prescribing more when patient returns             |
| seeing patients face-to-face for AP               |
| separating patient's suffering from AP decisions  |
| symptomology                                      |

| Name                                                 |
|------------------------------------------------------|
| thinking of risks of AB when prescribing             |
| unusual guideline recommendations                    |
| weighing rationales for AP and AMR                   |
| factors influencing antibiotic prescribing decisions |
| indications often prescribed for                     |
| investigating clinical signs                         |
| non-clinical factors                                 |
| access to care                                       |
| having too little time for consultations             |
| timing of consultation influencing GP decision       |
| patient groups at high AB-related risks              |
| patient groups at high infection-related risks       |
| patients appearance as factor in decisions           |
| prescribing more to children                         |
| resources used in decision-making                    |
| consulting with colleagues                           |
| deciding based on Point-of-care tests                |
| guidelines used                                      |
| taking history and comorbidities into account        |
| GP culture in practice                               |
| change in practice leading to higher AP              |
| GP groups following the same pattern                 |
| having protocols for AP for all practitioners        |

| Name                                                 |
|------------------------------------------------------|
| influential GPs within the practice                  |
| practice culture of consulting with colleagues       |
| GP factors influencing decision-making               |
| being proactive                                      |
| change in personal clinical practice                 |
| changes to how GPs are trained                       |
| GPs with prescribing as a habit                      |
| personal clinical practice                           |
| professional confidence                              |
| professional discrepancies                           |
| research experience                                  |
| staying up to date with guidance                     |
| variability in GP styles                             |
| younger GPs following guidance and tools more        |
| needs for tools around improving prescribing         |
| requirements of useful electronic tool               |
| shortcomings of electronic tools                     |
| lack of confidence in accuracy of tool               |
| limitations of tool to provide individualized care   |
| showing information to back up decision-making       |
| use of existing electronic tools                     |
| usefulness of electronic tool                        |
| using tools to justify decisions made on other basis |



| Name                                                          |
|---------------------------------------------------------------|
| other                                                         |
| future plans                                                  |
| knowledge of practice prescribing status                      |
| local environmental health factors                            |
| North South differences                                       |
| patient population in practice                                |
| reasons provided to explain study findings for AB prescribing |
| GP providing explanations of study and recommendations        |
| Questioning study quant findings                              |
| research engagement                                           |
| seeing effects of public health messages                      |
| systematic change                                             |
| work experience as GP                                         |
| outcomes of consultations relating to AB                      |
| being confronted with adverse outcome                         |
| coping with short consultation time                           |
| effectiveness of negotiating with patients                    |
| fitting decision to guidance after-the-fact                   |
| following guidelines leading to more AP                       |
| patient getting AB from other practitioner                    |
| rethinking AP decisions after the fact                        |
| sticking with own decision                                    |
| patient behaviours                                            |

| Name                                        |
|---------------------------------------------|
| feeling that patients expect results        |
| GP behaviours creating patient expectations |
| medicalization among patient groups         |
| older patients accepting GP authority       |
| patient awareness of AMR                    |
| patient expecting AB                        |
| patient groups demanding AB most            |
| patients choosing GP based on AP behaviours |
| self-managing patients expecting AB less    |

#### Abbreviations:

|     |                          |
|-----|--------------------------|
| AB  | Antibiotics              |
| AMR | Antimicrobial Resistance |
| AP  | Antibiotic Prescribing   |
| GP  | General Practitioner     |
